# Supplementary figures and images for: Pax6 is essential for lens fiber cell differentiation
Source: Oxford University Press journal article supplement (doi:10.1242/dev.032888), 2009-07-02

$\alpha$ A-crystallin

2<sup>nd</sup> antibody

*Pax6*<sup>lox/lox</sup>

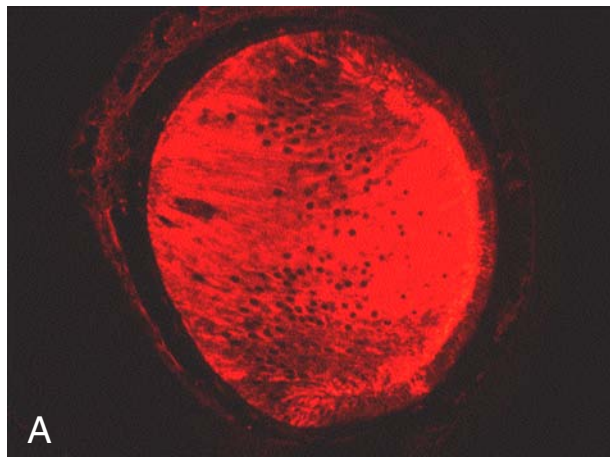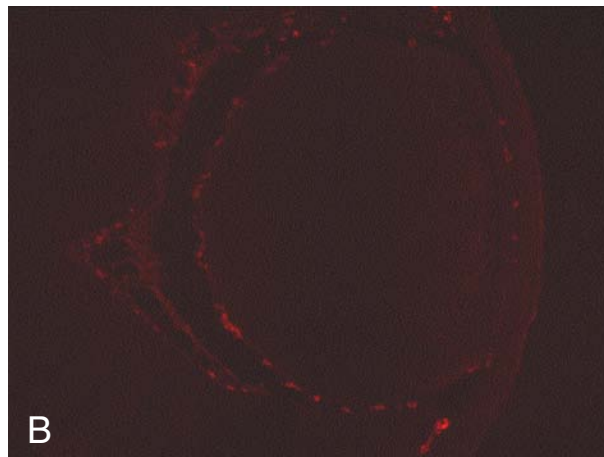

*Pax6*<sup>lox/lox</sup>; *Mir10*

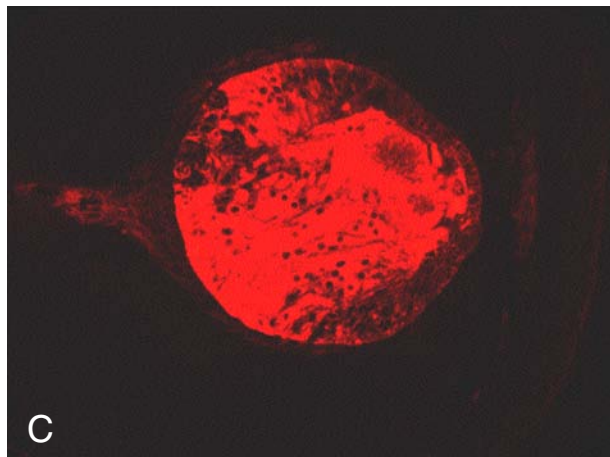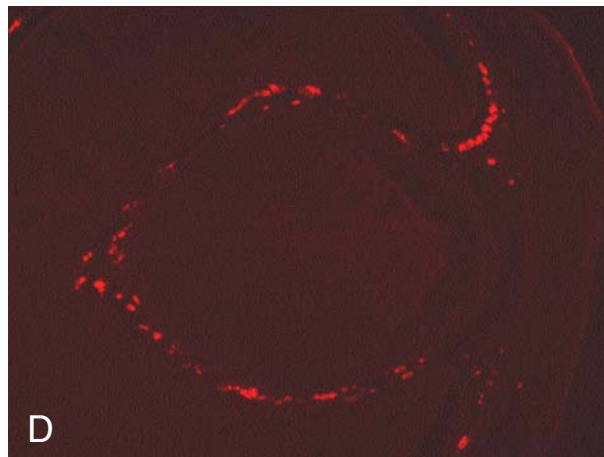

Supplement: dev032888-sup-032888-figs4.pdf [file dev032888-sup-032888-figs4.pdf]
